# Supplementary material for: Barriers to Remote Health Interventions for Type 2 Diabetes: A Systematic Review and Proposed Classification Scheme
Source: PubMed Central journal article supplement (PMC5329647; doi:10.2196/jmir.6382), 2017-02-13
Supplement: jmir_v19i2e28_app1.pdf [file jmir_v19i2e28_app1.pdf]

Search terms used for Medline and CINAHL.

### Medline Search

1. exp Telemedicine/ or exp Remote Consultation/
2. ((remote adj1 health) or mhealth or telehealth or ehealth).ti,ab.
3. (telemonitor\* or telemedicine).ti,ab.
4. or/1-3
5. exp Diabetes Mellitus, Type 2/
6. (diabetes adj1 (type 2 or type ii)).ti,ab.
7. (non insulin\$ depend\$ or noninsulin\$ depend\$ or noninsulin?depend\$ or non insulin?depend).tw,ot.
8. ((typ\$ 2 or typ\$ II) adj3 diabet\$).tw,ot.
9. or/5-8
10. 4 and 9
11. limit 10 to yr="2010 -Current"

### EMBASE Search

1. exp telemedicine/
2. ((remote adj1 health) or mhealth or telehealth or ehealth).ti,ab.
3. (telemonitor\* or telemedicine).ti,ab.
4. or/1-3
5. exp non insulin dependent diabetes mellitus/
6. (diabetes adj1 (type 2 or type ii)).ti,ab.
7. (non insulin\$ depend\$ or noninsulin\$ depend\$ or noninsulin?depend\$ or non insulin?depend).tw,ot.
8. ((typ\$ 2 or typ\$ II) adj3 diabet\$).tw,ot.
9. or/5-8
10. 4 and 9
11. limit 10 to yr="2009 -Current"
12. limit 11 to english language

### CINAHL Search

(MH "Telemedicine+") OR (MH "Telehealth+") OR AB ( ((remote n1 health) or mhealth or telehealth or ehealth ) OR AB ( (telemonitor\* or telemedicine) ) AND ((MH "Diabetes Mellitus, Type 2") OR AB ( diabetes n1 (type 2 or type ii) ) OR AB ( (noninsulin depend\* or non insulin\*) ) OR AB ( ((type 2 or type II) n3 diabet\* )
